# Supplementary material
Source: publisher figshare collection journal article supplement (https://acs.figshare.com/ndownloader/files/3773053)

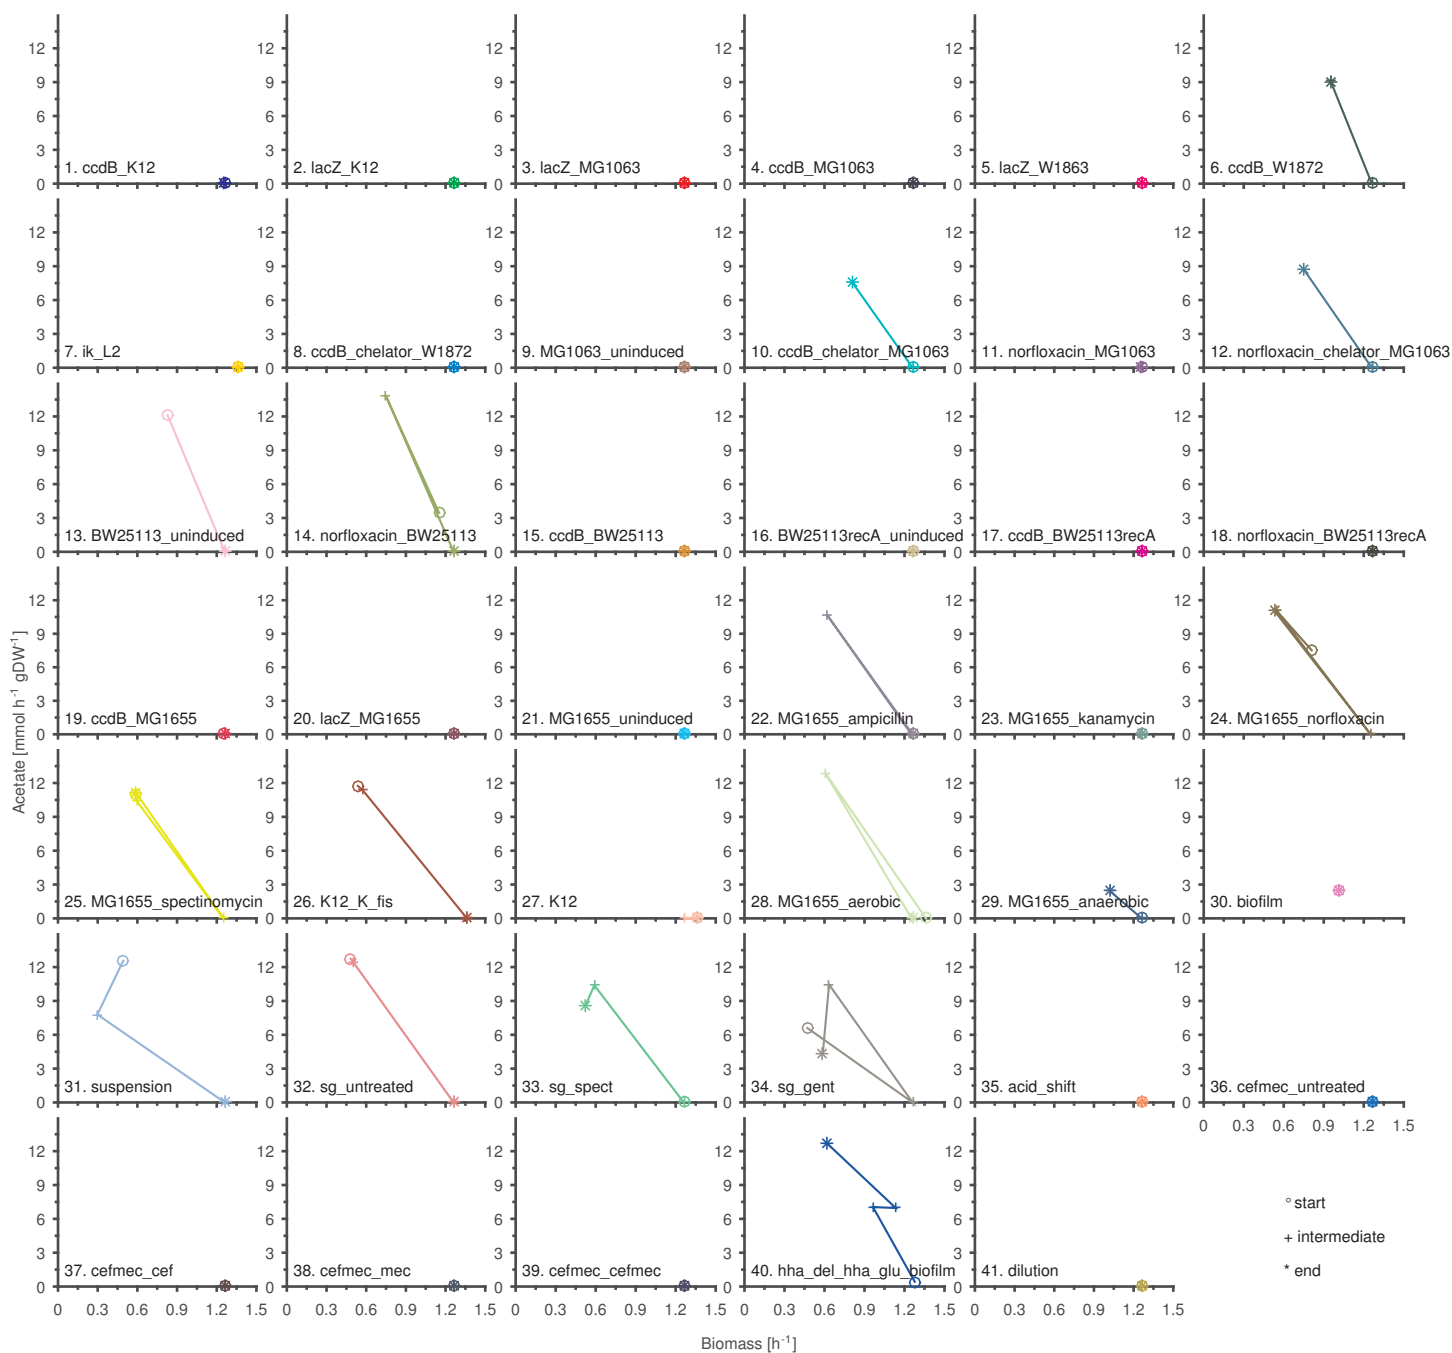

Supplement: Supplementary file 1 [file 3773053]

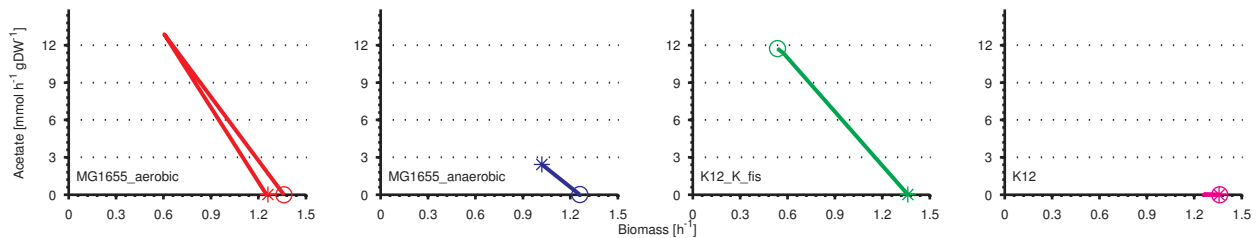

Supplement: Supplementary file 2 [file 3773053]

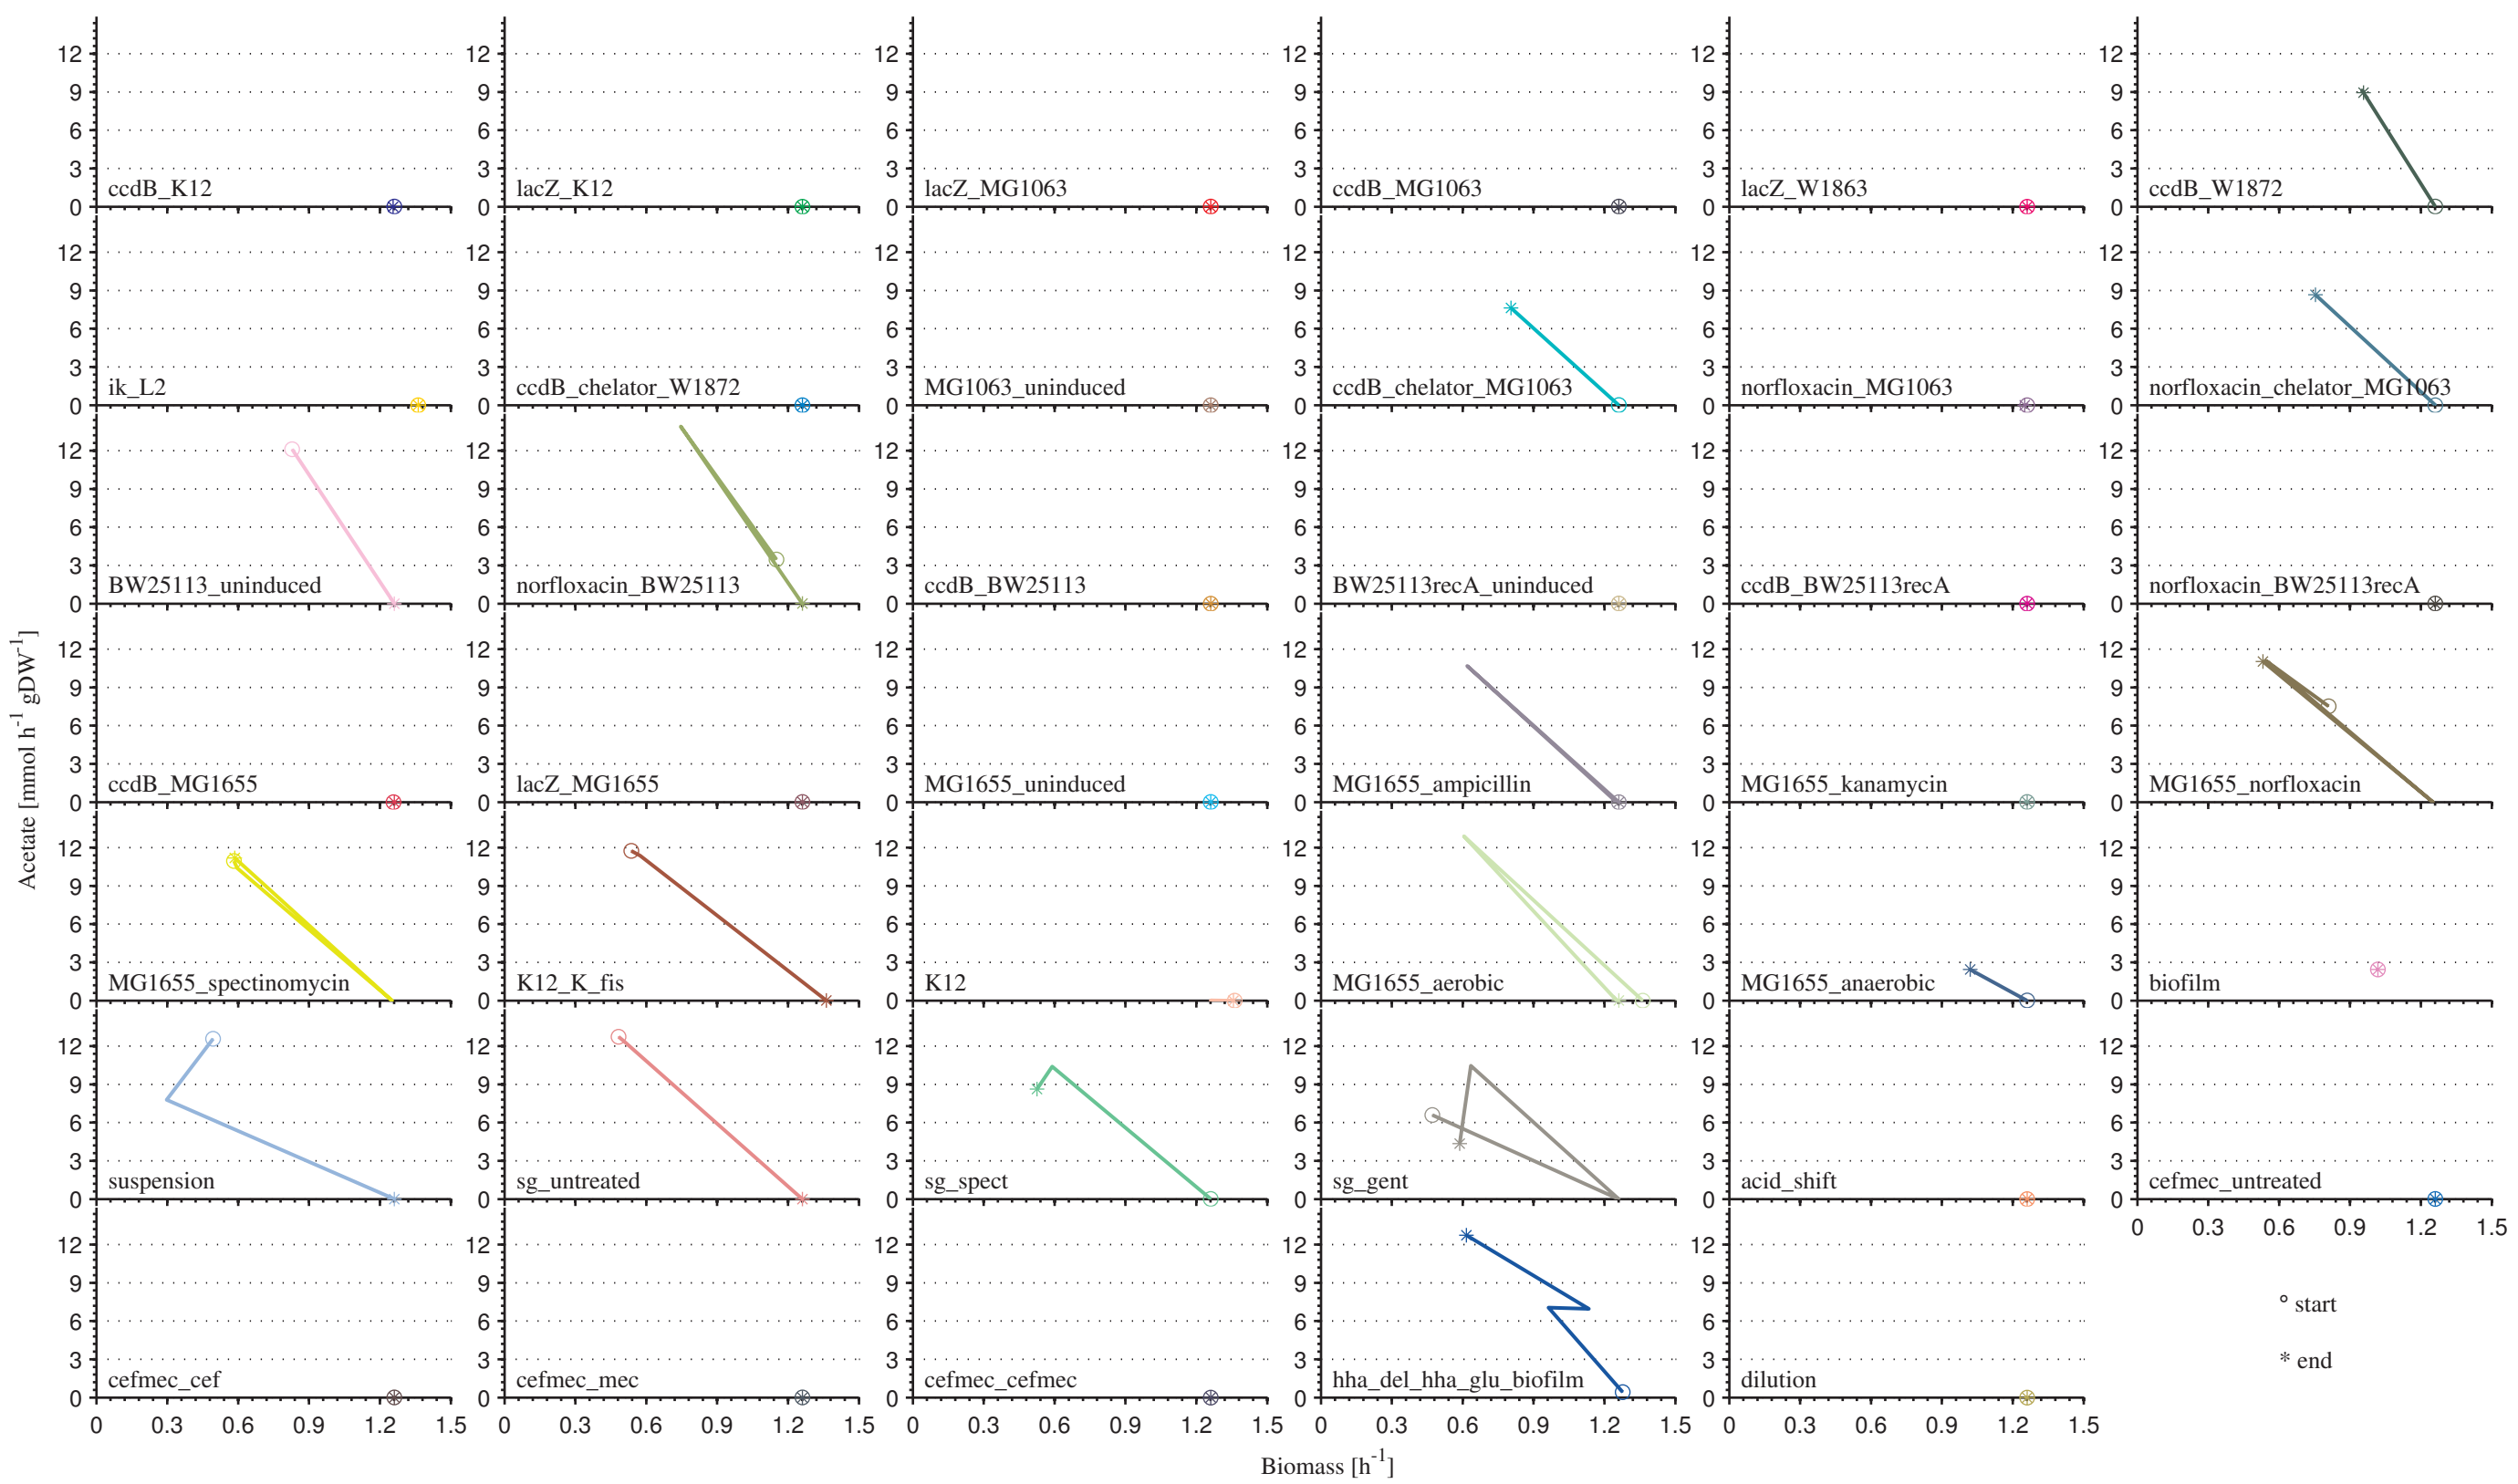

Supplement: Supplementary file 3 [file 3773053]
